# Supplementary material
Source: PubMed Central journal article supplement (PMC8091026)
Supplement: AEM.00091-21-s0001.pdf [file AEM.00091-21-s0001.pdf]

**Biosurfactants produced by phyllosphere colonising *Pseudomonads* impact on diesel degradation but not on colonisation of gnotobiotic arabidopsis leaves.**

Oso S, Fuchs F, Übermuth C, Zander L, Daunaraviciute S, Remus DM, Botscher I, Wüst M, Schreiber L, Remus-Emsermann MNP

**Supplemental Table 1** Insertion sites of Tn5 transposons. Tn5 transposon flanking site is underlined

| Strain name           | Sequence 5' - 3'                                                                                                                                                                                                                                                                                           | Close protein match<br>NCBI accession # |
|-----------------------|------------------------------------------------------------------------------------------------------------------------------------------------------------------------------------------------------------------------------------------------------------------------------------------------------------|-----------------------------------------|
| PFF1::ezTn5-<br>viscB | <u>AGATGTGTATAAGAGACAGGCGAACAGGCCACG</u><br>AAGCCTTCTTCCGCGACATGCTCGCCGACATCGAC<br>GAGCCGACGTTGCCCTTCGGCCTGCAGGACGTGC<br>AGGGCGATGGCCTGGGCATCGACGAAGCGCGCC<br>TGCCGGTTGAGCATGCCCTCAGCCTGCGCTTGCG<br>CAGCCTGGCGCGTCCATTGGGCGTGGGTGTGGCA<br>AGCTTGATGCACCTGGCGCTGGCCCGGGTGTGG<br>GGTGGTGTGCGGGCCGGGAGTCGGTGG | AUZ46831.1                              |
| PFF2::ezTn5-<br>viscB | <u>AGATGTGTATAAGAGACAGATATCACGGCCGTCGC</u><br>CCTGCACGTCCTGCACGCCGAAGGGCAAGGTGGG<br>CTCATTGATGTCGGCAAGCATTTCGCGGAAAAACC<br>GCTCATGCTCGTCGACGCTCACACCCAGGCGCGC<br>CTGGGCCACGTAGTTGCGAAATGGCGCGGCCGCC<br>GGCAAGTCCTGGCCGTGGTTGAACAGGAACGCGC<br>CCATCTCCTGGCCGACCACGTCCATGGCGGTGTG<br>GTCCAGCGCC              | QHF44604.1                              |
| PFF3::ezTn5-<br>massB | <u>AGATGTGTATAAGAGACAGGCTCCACCTGCAACAC</u><br>CTCGGCCACAGCCGCGCCAGGGTGGTTTTGACG<br>TCACCTTGGGGGGCTTGGTATTCACGACTGAGCAA<br>GGCGCACTGGTCTGGCTGCGGCAGTGCCTTGCGA<br>TCCAGTTTTGCC                                                                                                                               | ABH06368.2                              |
| PFF4::ezTn5-<br>massB | <u>AGATGTGTATAAGAGACAGGTGATGCCCTGCCAG</u><br>GCCGACACCGCCTCGGCATTGGCGGCGGACGCG<br>CTGTGGCGATAGTTGAGCAGTGCCTGAACAGCG<br>GCGTGGCGCGAGCACGCCACTGCAACGCTGGG<br>CCAGGGCCAAGGCCGCGTGTTCATGGCGCAGCAA<br>GGTGGTCAGCCGTGCGTGGGTGGCCTTGACGGC<br>GGTGCGCACGTCCTGGGCGTCTACGTCCACGCGA<br>AACGGCAAGGTATTG                | ABH06368.2                              |

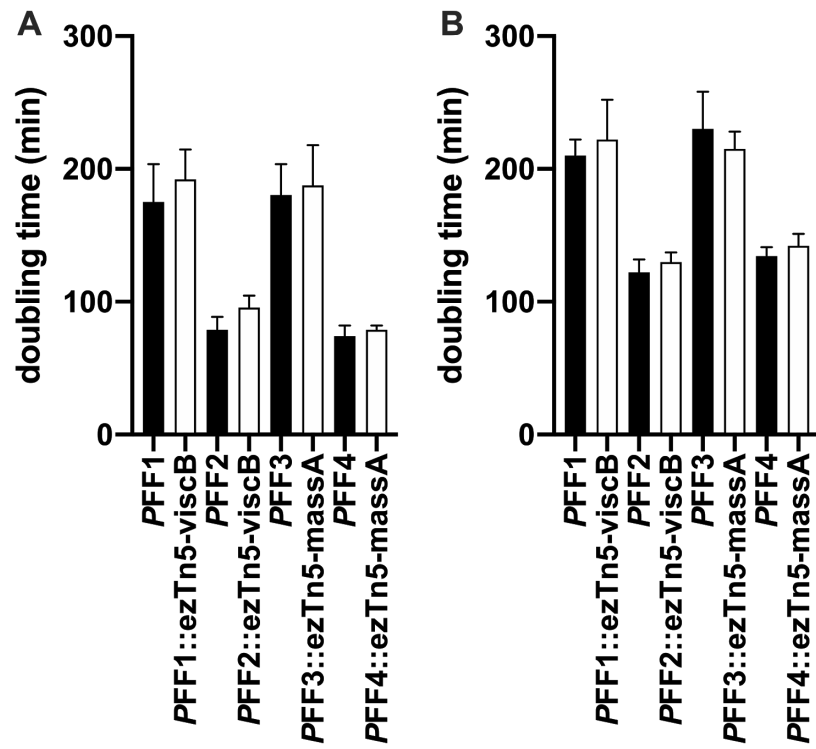

Supplemental figure 1. Doubling time of wild types and mutants on A) KB medium B) M9 supplemented with glucose. No significant difference was found between the doubling time of the wild types and the respective surfactant mutants.

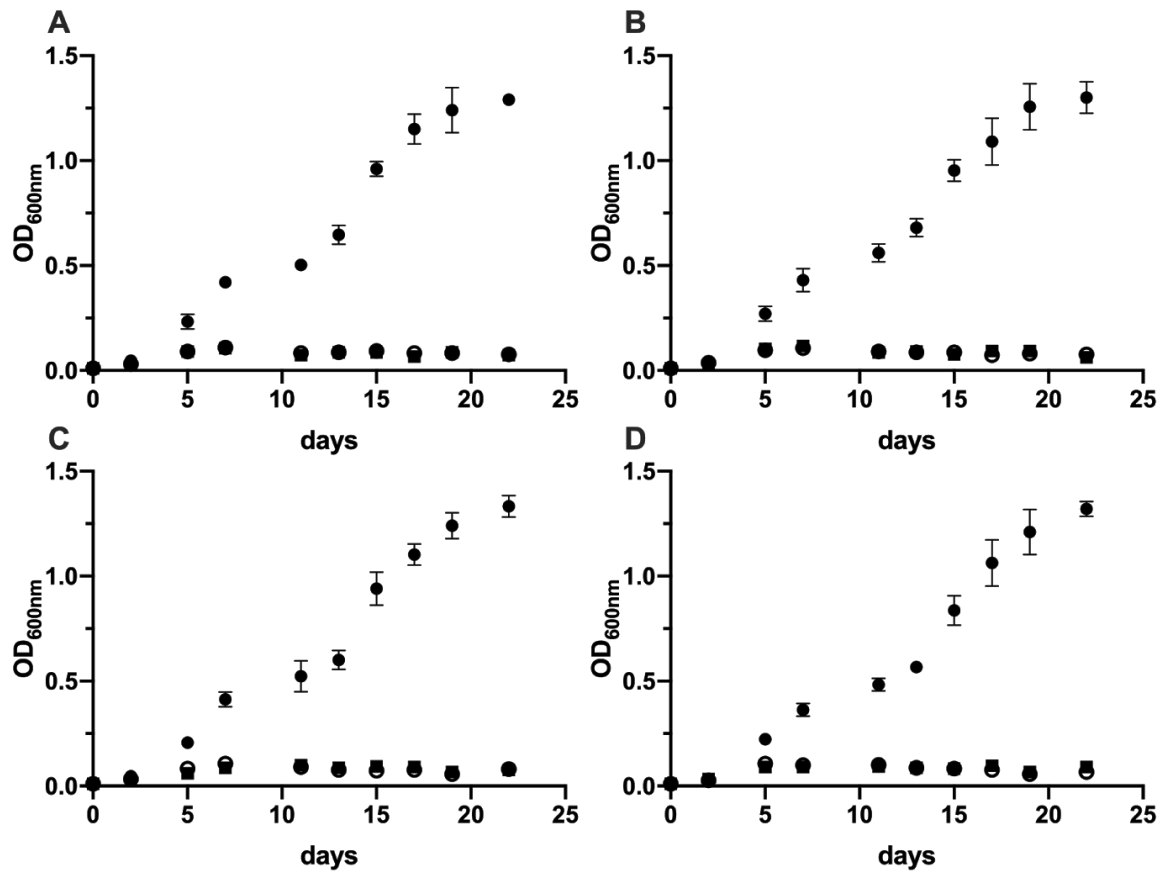

**Supplemental figure 2. Growth of *Pseudomonas* knockout mutants on surfactants alone.** BHB was supplemented with either wild type surfactant (open circles), Tween-20 (filled squares) or diesel as a positive control (filled circles). Growth was only observed on diesel but not on wild type surfactant or Tween-20. A) PFF1; B) PFF2; C) PFF3; D) PFF4. Error bars depict the standard deviation of the mean of three replicates.

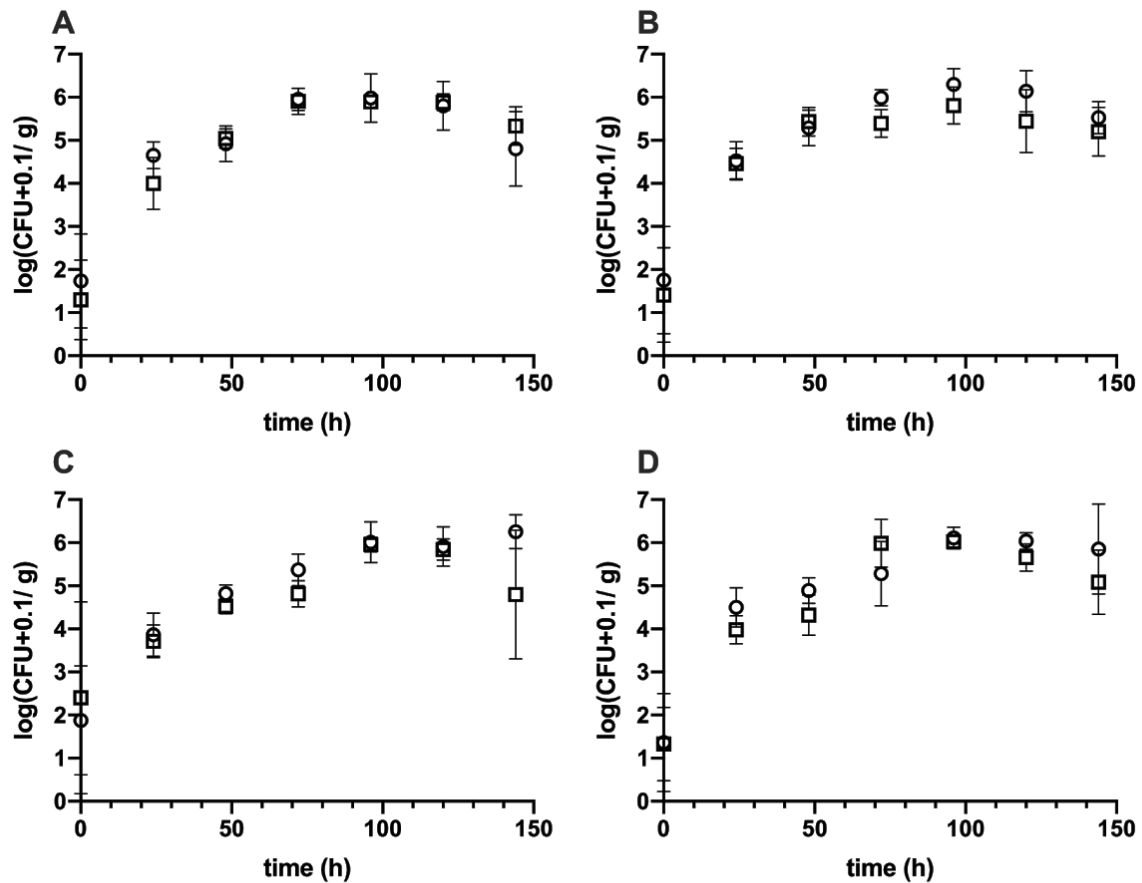

**Supplemental figure 3. *In planta* growth of wild types (open circles) and mutants (open squares).** A) PFF1 and PFF1::ezTn5-viscB, B) PFF2 and PFF2::ezTn5-visB, C) PFF3 and PFF3::ezTn5-massA, D) PFF4 and PFF4::ezTn5-massA. The statistical analysis can be found in supplemental table 4. Error bars depict the standard deviation of the mean of five replicates.
